# Supplementary material for: Interaction mechanism exploration of HEA derivatives as BACE1 inhibitors by in silico analysis
Source: Royal Society of Chemistry journal article supplement (doi:10.1039/c5mb00859j), 2016-02-16
Supplement: c5mb00859j1.pdf [file c5mb00859j1.pdf]

Table S1 Structure-activity relationship data related to the series of hydroxyethylamine derivatives as BACE1 inhibitors

Table S2 Observed and predicted BACE1 inhibitor activities (pIC<sub>50</sub> value, M)

Table S3 The pdb files of the top structures used in docking and MD analyses

Table S1 Structure-activity relationship data related to the series of hydroxyethylamine derivatives as BACE1 inhibitors

| No.             | R                                                                                   | IC <sub>50</sub> (nM) | pIC <sub>50</sub> |
|-----------------|-------------------------------------------------------------------------------------|-----------------------|-------------------|
|                 | 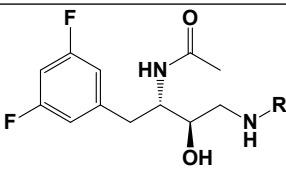   |                       |                   |
| 1               |    | 47                    | 7.33              |
| 2               |    | 59                    | 7.23              |
| 3               |    | 61                    | 7.21              |
| 4 <sup>§</sup>  |    | 270                   | 6.57              |
| 5               |   | 220                   | 6.66              |
| 6               |  | 2400                  | 5.62              |
| 7               |  | 4700                  | 5.33              |
| 8               |  | 380                   | 6.42              |
| 9               |  | 18                    | 7.74              |
| 10 <sup>§</sup> |  | 400                   | 6.4               |
| 11 <sup>§</sup> |  | 860                   | 6.07              |

To be continued

| No.             | R                                                                                   | IC <sub>50</sub> (nM) | pIC <sub>50</sub> |
|-----------------|-------------------------------------------------------------------------------------|-----------------------|-------------------|
| 12 <sup>§</sup> | 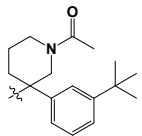   | 1300                  | 5.89              |
| 13              |    | 330                   | 6.48              |
| 14              |    | 47                    | 7.33              |
| 15              |    | 120                   | 6.92              |
| 16 <sup>§</sup> |   | 9200                  | 5.04              |
| 17              |  | 24                    | 7.62              |
| 18              |  | 38                    | 7.42              |
| 19              |  | 48                    | 7.32              |
| 20 <sup>§</sup> |  | 49                    | 7.31              |
| 21 <sup>§</sup> |  | 24                    | 7.62              |
| 22              |  | 33                    | 7.48              |

To be continued

| No. | R                                                                                   | IC <sub>50</sub> (nM) | pIC <sub>50</sub> |
|-----|-------------------------------------------------------------------------------------|-----------------------|-------------------|
| 23  | 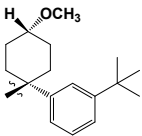   | 140                   | 6.85              |
| 24  |    | 380                   | 6.42              |
| 25  |    | 210                   | 6.68              |
| 26  |    | 8.8                   | 8.06              |
| 27  |   | 19                    | 7.72              |
| 28  |  | 100                   | 7                 |
| 29  |  | 240                   | 6.62              |
| 30  |  | 210                   | 6.68              |
| 31§ |  | 400                   | 6.4               |
| 32  |  | 240                   | 6.62              |
| 33§ |  | 350                   | 6.46              |

To be continued

| No.             | R                                                                                   | IC <sub>50</sub> (nM) | pIC <sub>50</sub> |
|-----------------|-------------------------------------------------------------------------------------|-----------------------|-------------------|
| 34 <sup>§</sup> | 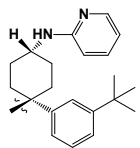   | 73                    | 7.14              |
| 35              |    | 85                    | 7.07              |
| 36              |    | 500                   | 6.3               |
| 37              |    | 12                    | 7.92              |
| 38              |   | 14                    | 7.85              |
| 39 <sup>§</sup> |  | 460                   | 6.34              |
| 40 <sup>§</sup> |  | 690                   | 6.16              |
| 41              |  | 100                   | 7                 |
| 42              |  | 380                   | 6.42              |
| 43 <sup>§</sup> |  | 130                   | 6.89              |
| 44              |  | 810                   | 6.09              |
| 45              |  | 410                   | 6.39              |

To be continued

| No.             | R                                                                                   | IC <sub>50</sub> (nM) | pIC <sub>50</sub> |
|-----------------|-------------------------------------------------------------------------------------|-----------------------|-------------------|
| 46              | 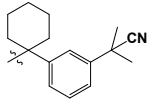   | 166                   | 6.78              |
| 47 <sup>§</sup> |    | 6200                  | 5.21              |
| 48              |    | 260                   | 6.59              |
| 49              |    | 720                   | 6.14              |
| 50 <sup>§</sup> |    | 1700                  | 5.77              |
| 51              |   | 1100                  | 5.96              |
| 52              |  | 120                   | 6.92              |
| 53 <sup>§</sup> |  | 44                    | 7.36              |
| 54              |  | 370                   | 6.43              |
| 55 <sup>§</sup> |  | 110                   | 6.96              |
| 56              |  | 1600                  | 5.8               |
| 57              |  | 7700                  | 5.11              |
| 58              |  | 940                   | 6.03              |
| 59 <sup>§</sup> |  | 180                   | 6.74              |

To be continued

| No.             | R | IC <sub>50</sub> (nM) | pIC <sub>50</sub> |
|-----------------|---|-----------------------|-------------------|
| 60 <sup>§</sup> |   | 88                    | 7.06              |
| 61 <sup>§</sup> |   | 820                   | 6.09              |
| 62              |   | 1300                  | 5.89              |
| 63              |   | 1400                  | 5.85              |
| 64              |   | 800                   | 6.1               |
| 65              |   | 340                   | 6.47              |
| 66              |   | 250                   | 6.6               |
| 67              |   | 1300                  | 5.89              |
| 68              |   | 1000                  | 6                 |
| 69              |   | 750                   | 6.12              |
| 70 <sup>§</sup> |   | 560                   | 6.25              |
| 71              |   | 700                   | 6.15              |
| 72              |   | 580                   | 6.24              |
| 73 <sup>§</sup> |   | 580                   | 6.24              |
| 74              |   | 1700                  | 5.77              |

To be continued

| No. | R                                                                                   | IC <sub>50</sub> (nM) | pIC <sub>50</sub> |
|-----|-------------------------------------------------------------------------------------|-----------------------|-------------------|
| 75  | 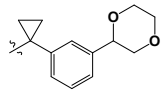   | 4000                  | 5.4               |
| 76  |    | 2400                  | 5.62              |
| 77§ |    | 1900                  | 5.72              |
| 78  |    | 2100                  | 5.68              |
| 79  |    | 46                    | 7.34              |
| 80  |    | 174                   | 6.76              |
| 81  |  | 223                   | 6.65              |
| 82  |  | 180                   | 6.74              |
| 83  |  | 77                    | 7.11              |
| 84§ |  | 170                   | 6.77              |
| 85  |  | 318                   | 6.5               |
| 86  |  | 93                    | 7.03              |



To be continued

| No.             | R                                                                                   | IC <sub>50</sub> (nM) | pIC <sub>50</sub> |
|-----------------|-------------------------------------------------------------------------------------|-----------------------|-------------------|
| 87              | 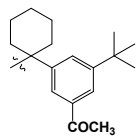   | 160                   | 6.8               |
| 88 <sup>§</sup> |    | 6900                  | 5.16              |
| 89              |    | 4010                  | 5.4               |
| 90              |    | 320                   | 6.49              |
| 91              |    | 352                   | 6.45              |
| 92              |   | 104                   | 6.98              |
| 93              |  | 131                   | 6.88              |
| 94 <sup>§</sup> |  | 4316                  | 5.36              |
| 95              |  | 1740                  | 5.76              |
| 96 <sup>§</sup> |  | 4457                  | 5.35              |
| 97              |  | 139                   | 6.86              |
| 98              |  | 1580                  | 5.8               |
| 99              |  | 137800                | 3.86              |
| 100             |  | 1840                  | 5.74              |

To be continued

| No.              | R                                                                                   | IC <sub>50</sub> (nM) | pIC <sub>50</sub> |
|------------------|-------------------------------------------------------------------------------------|-----------------------|-------------------|
| 101              | 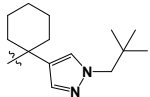   | 210                   | 6.68              |
| 102              |    | 154                   | 6.81              |
| 103              |    | 392                   | 6.41              |
| 104 <sup>s</sup> |    | 2430                  | 5.61              |
| 105 <sup>s</sup> |    | 140                   | 6.85              |
| 106              |    | 341                   | 6.47              |
| 107              |  | 640                   | 6.19              |
| 108              |  | 780                   | 6.11              |
| 109              |  | 610                   | 6.21              |
| 110              |  | 1620                  | 5.79              |
| 111              |  | 470                   | 6.33              |
| 112              |  | 4900                  | 5.31              |
| 113              |  | 42880                 | 4.37              |
| 114              |  | 9360                  | 5.03              |
| 115              |  | 3050                  | 5.52              |
| 116              |  | 346                   | 6.46              |
| 117              |  | 870                   | 6.06              |
| 118              |  | 450                   | 6.35              |

To be continued

| No.              | R | IC <sub>50</sub> (nM) | pIC <sub>50</sub> |
|------------------|---|-----------------------|-------------------|
| 119              |   | 110                   | 6.96              |
| 120              |   | 290                   | 6.54              |
| 121              |   | 1300                  | 5.89              |
| 122 <sup>§</sup> |   | 200                   | 6.7               |
| 123 <sup>§</sup> |   | 980                   | 6.01              |
| 124 <sup>§</sup> |   | 760                   | 6.12              |
| 125              |   | 1300                  | 5.89              |
| 126              |   | 290                   | 6.54              |
| 127              |   | 230                   | 6.64              |
| 128              |   | 390                   | 6.41              |

<sup>§</sup> Test set

Table S2 Observed and predicted BACE1 inhibitor activities (pIC<sub>50</sub> value, M)

| No. | Observed activity | CoMFA     |         | CoMSIA    |         |
|-----|-------------------|-----------|---------|-----------|---------|
|     |                   | Predicted | Residue | Predicted | Residue |
| 1   | 7.33              | 6.671     | 0.659   | 6.638     | 0.692   |
| 2   | 7.23              | 7.121     | 0.109   | 7.081     | 0.149   |
| 3   | 7.21              | 6.945     | 0.265   | 6.981     | 0.229   |
| 4   | 6.57              | 6.649     | -0.079  | 6.541     | 0.029   |
| 5   | 6.66              | 6.497     | 0.163   | 6.474     | 0.186   |
| 6   | 5.62              | 5.308     | 0.312   | 5.517     | 0.103   |
| 7   | 5.33              | 5.822     | -0.492  | 5.251     | 0.079   |
| 8   | 6.42              | 6.695     | -0.275  | 6.788     | -0.368  |
| 9   | 7.74              | 7.059     | 0.681   | 7.668     | 0.072   |
| 10  | 6.4               | 6.64      | -0.24   | 6.208     | 0.192   |
| 11  | 6.07              | 6.348     | -0.278  | 6.456     | -0.386  |
| 12  | 5.89              | 6.409     | -0.519  | 6.05      | -0.16   |
| 13  | 6.48              | 6.955     | -0.475  | 6.659     | -0.179  |
| 14  | 7.33              | 6.975     | 0.355   | 6.852     | 0.478   |
| 15  | 6.92              | 6.677     | 0.243   | 7.012     | -0.092  |
| 16  | 5.04              | 6.326     | -1.286  | 5.06      | -0.02   |
| 17  | 7.62              | 7.135     | 0.485   | 7.315     | 0.305   |
| 18  | 7.42              | 7.274     | 0.146   | 7.452     | -0.032  |
| 19  | 7.32              | 6.647     | 0.673   | 7.264     | 0.056   |
| 20  | 7.31              | 6.245     | 1.065   | 7.275     | 0.035   |
| 21  | 7.62              | 5.512     | 2.108   | 7.285     | 0.335   |
| 22  | 7.48              | 7.116     | 0.364   | 7.11      | 0.37    |
| 23  | 6.85              | 7.036     | -0.186  | 7.124     | -0.274  |
| 24  | 6.42              | 7.153     | -0.733  | 6.823     | -0.403  |
| 25  | 6.68              | 6.894     | -0.214  | 6.655     | 0.025   |
| 26  | 8.06              | 7.305     | 0.755   | 8.182     | -0.122  |
| 27  | 7.72              | 7.27      | 0.45    | 7.854     | -0.134  |
| 28  | 7                 | 6.844     | 0.156   | 7.081     | -0.081  |
| 29  | 6.62              | 6.985     | -0.365  | 6.513     | 0.107   |
| 30  | 6.68              | 7.107     | -0.427  | 6.903     | -0.223  |
| 31  | 6.4               | 6.822     | -0.422  | 6.299     | 0.101   |
| 32  | 6.62              | 6.751     | -0.131  | 6.324     | 0.296   |

To be continued

| No. | Observed activity | CoMFA     |         | CoMSIA    |         |
|-----|-------------------|-----------|---------|-----------|---------|
|     |                   | Predicted | Residue | Predicted | Residue |
| 33  | 6.46              | 6.67      | -0.21   | 6.282     | 0.178   |
| 34  | 7.14              | 5.834     | 1.306   | 6.693     | 0.447   |
| 35  | 7.07              | 7.128     | -0.058  | 6.989     | 0.081   |
| 36  | 6.3               | 6.766     | -0.466  | 5.915     | 0.385   |
| 37  | 7.92              | 7.482     | 0.438   | 7.896     | 0.024   |
| 38  | 7.85              | 6.865     | 0.985   | 7.852     | -0.002  |
| 39  | 6.34              | 6.238     | 0.102   | 6.297     | 0.043   |
| 40  | 6.16              | 6.129     | 0.031   | 6.481     | -0.321  |
| 41  | 7                 | 6.25      | 0.75    | 6.482     | 0.518   |
| 42  | 6.42              | 6.147     | 0.273   | 6.454     | -0.034  |
| 43  | 6.89              | 6.675     | 0.215   | 6.623     | 0.267   |
| 44  | 6.09              | 6.12      | -0.03   | 6.437     | -0.347  |
| 45  | 6.39              | 6.037     | 0.353   | 6.471     | -0.081  |
| 46  | 6.78              | 6.789     | -0.009  | 6.579     | 0.201   |
| 47  | 5.21              | 6.025     | -0.815  | 5.311     | -0.101  |
| 48  | 6.59              | 6.577     | 0.013   | 6.796     | -0.206  |
| 49  | 6.14              | 6.58      | -0.44   | 6.063     | 0.077   |
| 50  | 5.77              | 5.95      | -0.18   | 5.517     | 0.253   |
| 51  | 5.96              | 6.406     | -0.446  | 6.423     | -0.463  |
| 52  | 6.92              | 6.287     | 0.633   | 6.475     | 0.445   |
| 53  | 7.36              | 6.433     | 0.927   | 7.215     | 0.145   |
| 54  | 6.43              | 6.406     | 0.024   | 6.406     | 0.024   |
| 55  | 6.96              | 6.178     | 0.782   | 6.734     | 0.226   |
| 56  | 5.8               | 6.292     | -0.492  | 6.033     | -0.233  |
| 57  | 5.11              | 5.152     | -0.042  | 5.23      | -0.12   |
| 58  | 6.03              | 6.245     | -0.215  | 6.513     | -0.483  |
| 59  | 6.74              | 6.203     | 0.537   | 6.476     | 0.264   |
| 60  | 7.06              | 6.023     | 1.037   | 7.062     | -0.002  |
| 61  | 6.09              | 6.197     | -0.107  | 5.996     | 0.094   |
| 62  | 5.89              | 6.019     | -0.129  | 5.926     | -0.036  |
| 63  | 5.85              | 5.743     | 0.107   | 5.893     | -0.043  |
| 64  | 6.1               | 5.986     | 0.114   | 6.171     | -0.071  |

To be continued

| No. | Observed activity | CoMFA     |         | CoMSIA    |         |
|-----|-------------------|-----------|---------|-----------|---------|
|     |                   | Predicted | Residue | Predicted | Residue |
| 65  | 6.47              | 6.281     | 0.189   | 6.684     | -0.214  |
| 66  | 6.6               | 5.954     | 0.646   | 6.463     | 0.137   |
| 67  | 5.89              | 6.026     | -0.136  | 5.753     | 0.137   |
| 68  | 6                 | 5.886     | 0.114   | 5.729     | 0.271   |
| 69  | 6.12              | 6.006     | 0.114   | 6.189     | -0.069  |
| 70  | 6.25              | 6.053     | 0.197   | 5.914     | 0.336   |
| 71  | 6.15              | 5.983     | 0.167   | 6.416     | -0.266  |
| 72  | 6.24              | 5.955     | 0.285   | 5.933     | 0.307   |
| 73  | 6.24              | 5.98      | 0.26    | 6.214     | 0.026   |
| 74  | 5.77              | 5.861     | -0.091  | 5.821     | -0.051  |
| 75  | 5.4               | 5.826     | -0.426  | 5.381     | 0.019   |
| 76  | 5.62              | 5.786     | -0.166  | 5.718     | -0.098  |
| 77  | 5.72              | 5.944     | -0.224  | 5.594     | 0.126   |
| 78  | 5.68              | 6.224     | -0.544  | 6.414     | -0.734  |
| 79  | 7.34              | 6.533     | 0.807   | 6.654     | 0.686   |
| 80  | 6.76              | 6.583     | 0.177   | 6.655     | 0.105   |
| 81  | 6.65              | 6.579     | 0.071   | 6.702     | -0.052  |
| 82  | 6.74              | 6.69      | 0.05    | 6.744     | -0.004  |
| 83  | 7.11              | 6.715     | 0.395   | 6.697     | 0.413   |
| 84  | 6.77              | 6.538     | 0.232   | 6.551     | 0.219   |
| 85  | 6.5               | 6.654     | -0.154  | 6.703     | -0.203  |
| 86  | 7.03              | 7.159     | -0.129  | 6.895     | 0.135   |
| 87  | 6.8               | 6.63      | 0.17    | 6.926     | -0.126  |
| 88  | 5.16              | 6.182     | -1.022  | 5.218     | -0.058  |
| 89  | 5.4               | 6.026     | -0.626  | 6.121     | -0.721  |
| 90  | 6.49              | 6.422     | 0.068   | 6.499     | -0.009  |
| 91  | 6.45              | 6.375     | 0.075   | 6.459     | -0.009  |
| 92  | 6.98              | 6.718     | 0.262   | 6.309     | 0.671   |
| 93  | 6.88              | 6.386     | 0.494   | 6.508     | 0.372   |
| 94  | 5.36              | 6.201     | -0.841  | 5.722     | -0.362  |
| 95  | 5.76              | 6.45      | -0.69   | 6.292     | -0.532  |
| 96  | 5.35              | 6.133     | -0.783  | 5.32      | 0.03    |

To be continued

| No. | Observed activity | CoMFA     |         | CoMSIA    |         |
|-----|-------------------|-----------|---------|-----------|---------|
|     |                   | Predicted | Residue | Predicted | Residue |
| 97  | 6.86              | 5.897     | 0.963   | 6.83      | 0.03    |
| 98  | 5.8               | 6.203     | -0.403  | 5.704     | 0.096   |
| 99  | 3.86              | 6.806     | -2.946  | 4.132     | -0.272  |
| 100 | 5.74              | 5.657     | 0.083   | 5.727     | 0.013   |
| 101 | 6.68              | 6.556     | 0.124   | 6.586     | 0.094   |
| 102 | 6.81              | 6.611     | 0.199   | 6.665     | 0.145   |
| 103 | 6.41              | 6.053     | 0.357   | 6.537     | -0.127  |
| 104 | 5.61              | 6.126     | -0.516  | 5.456     | 0.154   |
| 105 | 6.85              | 6.174     | 0.676   | 6.552     | 0.298   |
| 106 | 6.47              | 5.931     | 0.539   | 6.367     | 0.103   |
| 107 | 6.19              | 5.832     | 0.358   | 5.939     | 0.251   |
| 108 | 6.11              | 6.005     | 0.105   | 6.346     | -0.236  |
| 109 | 6.21              | 6.477     | -0.267  | 6.488     | -0.278  |
| 110 | 5.79              | 5.629     | 0.161   | 5.804     | -0.014  |
| 111 | 6.33              | 5.822     | 0.508   | 6.439     | -0.109  |
| 112 | 5.31              | 6.106     | -0.796  | 5.662     | -0.352  |
| 113 | 4.37              | 5.967     | -1.597  | 4.487     | -0.117  |
| 114 | 5.03              | 5.636     | -0.606  | 4.529     | 0.501   |
| 115 | 5.52              | 5.836     | -0.316  | 5.753     | -0.233  |
| 116 | 6.46              | 6.764     | -0.304  | 6.485     | -0.025  |
| 117 | 6.06              | 5.884     | 0.176   | 5.837     | 0.223   |
| 118 | 6.35              | 6.582     | -0.232  | 6.183     | 0.167   |
| 119 | 6.96              | 7.575     | -0.615  | 7.183     | -0.223  |
| 120 | 6.54              | 6.681     | -0.141  | 6.462     | 0.078   |
| 121 | 5.89              | 6.557     | -0.667  | 6.146     | -0.256  |
| 122 | 6.7               | 5.953     | 0.747   | 6.744     | -0.044  |
| 123 | 6.01              | 6.896     | -0.886  | 5.934     | 0.076   |
| 124 | 6.12              | 5.842     | 0.278   | 6.215     | -0.095  |
| 125 | 5.89              | 6.176     | -0.286  | 6.406     | -0.516  |
| 126 | 6.54              | 6.359     | 0.181   | 6.511     | 0.029   |
| 127 | 6.64              | 6.456     | 0.184   | 6.518     | 0.122   |
| 128 | 6.41              | 6.149     | 0.261   | 6.523     | -0.113  |

Table S3 The pdb files of the top structures used in docking and MD analyses

| The top structures                 | Description                                                                                                                                        | Pdb file                                                                                                         |
|------------------------------------|----------------------------------------------------------------------------------------------------------------------------------------------------|------------------------------------------------------------------------------------------------------------------|
| X-ray structure                    | PDB code: 3IVH                                                                                                                                     | <br>3ivh.pdb                  |
| Obtained from the re-docking study | Fig. 7A Superimposed binding conformations of co-crystallized and re-docked compound C1.                                                           | <br>3IVH+redocked ligand      |
|                                    | Fig. 7B Superimposition of the predicted and re-docked conformations of compound C1                                                                | <br>redocked_predicted ligand |
|                                    | Fig. 7C Superimposition of the predicted compound 26 and re-docked compound C1 poses                                                               | <br>redocked ligand_26        |
| Obtained from the docking analysis | Fig. 8C The binding interactions of compound 26 with amino acids of BACE1.                                                                         | <br>M026_docking              |
|                                    | Fig. 10B The binding modes of compound 25 with amino acids of BACE1                                                                                | <br>025-docking               |
|                                    | Fig. 10C The binding modes of compounds 123 with amino acids of BACE1                                                                              | <br>123-docking             |
|                                    | Fig. 10D The binding modes of compounds 96 with amino acids of BACE1                                                                               | <br>96-docking              |
| Obtained from the MD simulation    | Fig. 9A The projection of the superimposed backbone atoms of the average structure of the last 1 ns of the MD simulation and the initial structure | <br>MD_Docking              |
|                                    | Fig. 9C The binding interactions between the ligand and the protein of MD simulation                                                               | <br>Md_26                   |
